# Supplementary material for: Ferromagnetic photocatalysts of FeTiO3–Fe2O3 nanocomposites
Source: Royal Society of Chemistry journal article supplement (doi:10.1039/c7ra11007c), 2017-01-01
Supplement: c7ra11007c1.pdf [file c7ra11007c1.pdf]

## Supporting Information

### Ferromagnetic photocatalysts of FeTiO<sub>3</sub>-Fe<sub>2</sub>O<sub>3</sub> nanocomposites

Baizhi Gao<sup>a</sup>, Caiping Yang<sup>a</sup>, Jun Chen<sup>a</sup>, Yuxing Ma<sup>a</sup>, Jiachen Xie<sup>a</sup>, Hao Zhang<sup>a</sup>,

Lujun Wei<sup>b</sup>, Qi Li<sup>a, \*</sup>, Jun Du<sup>b, c, \*</sup>, and Qingyu Xu<sup>a, c, \*</sup>

<sup>a</sup> School of Physics, Southeast University, Nanjing 211189, China

<sup>b</sup> School of Physics, Nanjing University, Nanjing 210093, China

<sup>c</sup> National Laboratory of Solid State Microstructures, Nanjing University, Nanjing

210093, China

#### The crystallite size of xFTO-(1-x)FO nanocomposites

Table S1. The crystallite sizes of xFTO-(1-x)FO nanocomposites from (110) peak using Scherrer's relation.

| Samples           | x=0.00  | x=0.20  | x=0.40  | x=0.60  | x=0.80  | x=1.00  |
|-------------------|---------|---------|---------|---------|---------|---------|
| Crystallite sizes | 60.0 nm | 40.7 nm | 41.8 nm | 66.6 nm | 43.0 nm | 53.8 nm |

#### The fitting results for Fe and Ti using XPS.

Table S2. The fitted results of XPS, in comparison with the EDX data. The calculated x is determined by the relative concentrations of Fe<sup>2+</sup> and Fe<sup>3+</sup> from FTO and FO.

| Samples (xFTO-(1-x)FO)              | x=1.00           |                  | x=0.80           |                  | x=0.60           |                  | x=0.00           |                  | Annealed at 300 °C |                  | Annealed at 700 °C |                  |
|-------------------------------------|------------------|------------------|------------------|------------------|------------------|------------------|------------------|------------------|--------------------|------------------|--------------------|------------------|
| Fitted peak area of                 | Fe <sup>2+</sup> | Fe <sup>3+</sup> | Fe <sup>2+</sup>   | Fe <sup>3+</sup> | Fe <sup>2+</sup>   | Fe <sup>3+</sup> |
| Fe (%)                              | 68.3             | 31.7             | 58.0             | 42.0             | 34.5             | 65.5             | 11.4             | 88.6             | 34.0               | 66.0             | 3.9                | 96.1             |
| Fe <sup>2+</sup> / Fe <sup>3+</sup> | 2.15             |                  | 1.38             |                  | 0.53             |                  | 0.13             |                  | 0.52               |                  | 0.04               |                  |
| Fitted peak area of                 | Ti <sup>3+</sup> | Ti <sup>4+</sup> | Ti <sup>3+</sup>   | Ti <sup>4+</sup> | Ti <sup>3+</sup>   | Ti <sup>4+</sup> |
| Ti (%)                              | 31.6             | 68.4             | 33.3             | 66.7             | 30.9             | 69.1             | /                | /                | 31.3               | 68.7             | 95.4               | 5.6              |
| Ti <sup>4+</sup> / Ti <sup>3+</sup> | 2.16             |                  | 2.00             |                  | 2.23             |                  | /                |                  | 2.20               |                  | 0.06               |                  |
| Calculated x (XPS)                  | 1.00             |                  | 0.89             |                  | 0.58             |                  | 0.00             |                  | 0.57               |                  | /                  |                  |
| Measured x (EDX)                    | /                |                  | 0.90             |                  | 0.55             |                  | 0.00             |                  | 0.55               |                  | 0.55               |                  |

The BET surface area of  $x=0.60$  and  $1.00$  nanocomposites.

| BET summary                    |                                                     |
|--------------------------------|-----------------------------------------------------|
| Slope =                        | 232.481                                             |
| Intercept =                    | 2.186e-01                                           |
| Correlation coefficient, $r =$ | <u>0.999575</u>                                     |
| C constant=                    | 1064.693                                            |
| Surface Area =                 | <b><math>x=0.60</math></b> 14.966 m <sup>2</sup> /g |

  

| BET summary                    |                                                     |
|--------------------------------|-----------------------------------------------------|
| Slope =                        | 130.500                                             |
| Intercept =                    | 1.133e+01                                           |
| Correlation coefficient, $r =$ | <u>0.962023</u>                                     |
| C constant=                    | 12.520                                              |
| Surface Area =                 | <b><math>x=1.00</math></b> 24.554 m <sup>2</sup> /g |

Figure S1. The BET surface area of  $x=0.60$  and  $1.00$  samples. The surface area is 14.966 m<sup>2</sup>/g for  $x=0.60$  and 24.554 m<sup>2</sup>/g for  $x=1.00$ .

The photocatalytic performance of physically mixed  $x\text{FTO}-(1-x)\text{FO}$  ( $x=0.60$ )

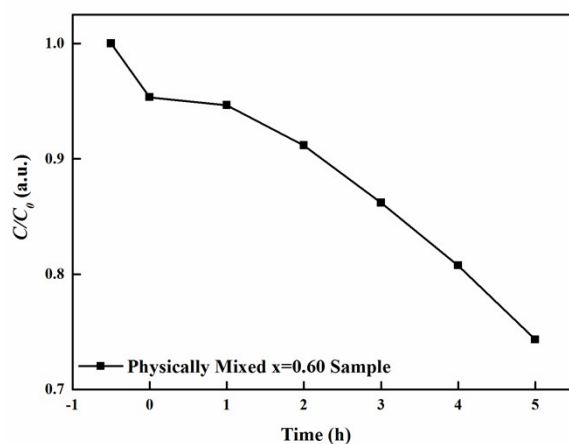

Figure S2. The photocatalytic performance of physically mixed  $x\text{FTO}-(1-x)\text{FO}$  ( $x=0.60$ ).

### XRD patterns of annealed xFTO-(1-x)FO (x=0.60)

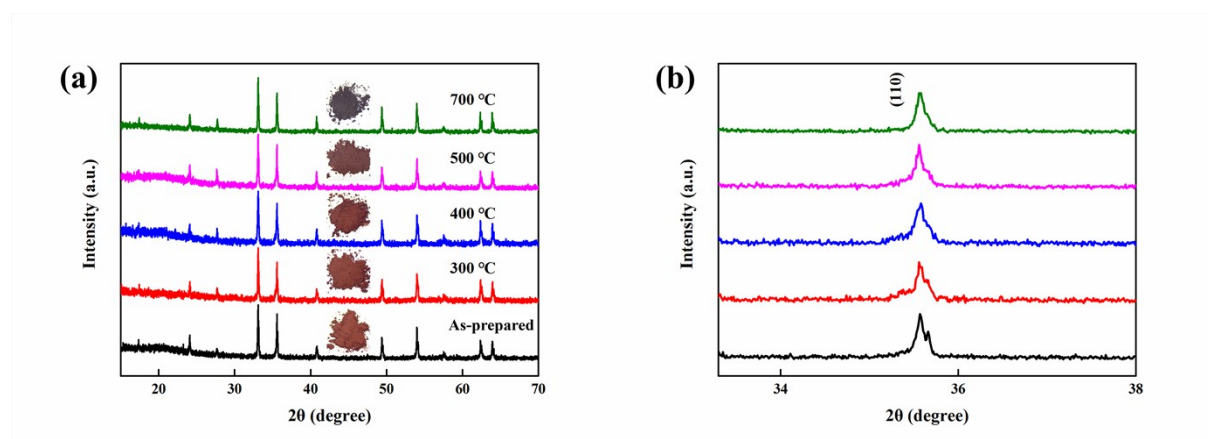

Figure S3. (a) The XRD patterns of xFTO-(1-x)FO (x=0.60) annealed at various temperatures, insets shows the corresponding images of the samples. (b) The magnified view of (110) peaks of the annealed samples.

### SEM images of annealed xFTO-(1-x)FO (x=0.60)

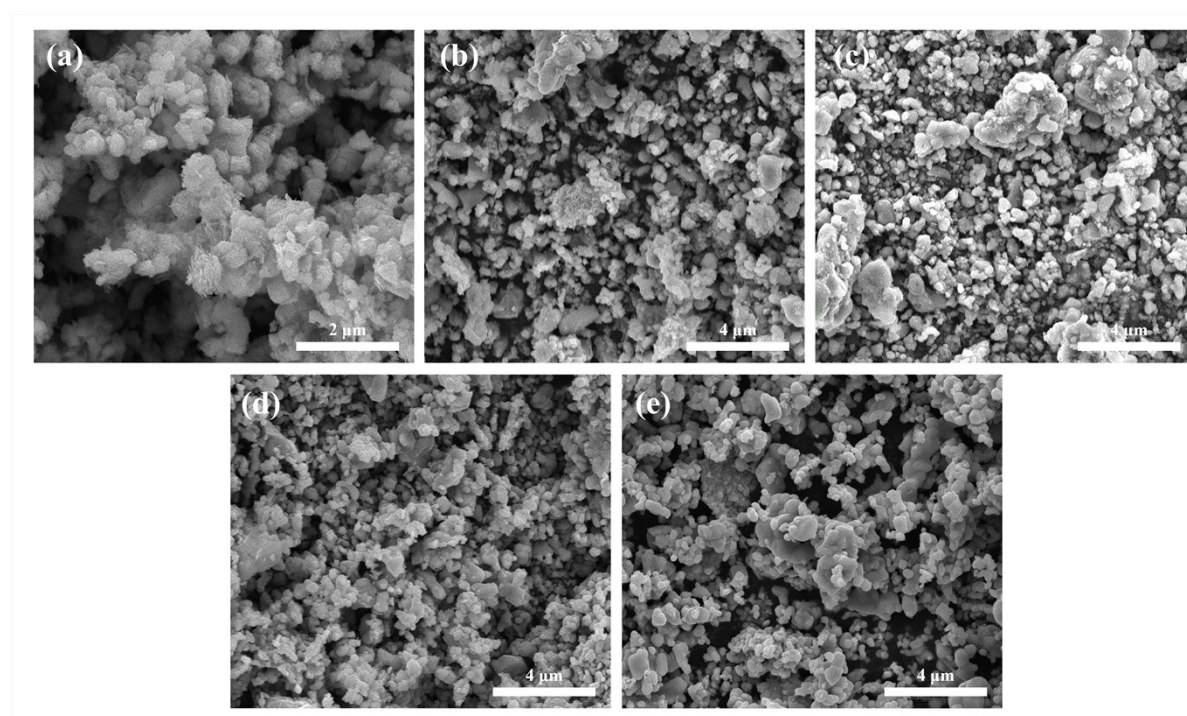

Figure S4. SEM images of xFTO-(1-x)FO (x=0.60) (a) as-prepared, and annealed at (b) 300 °C, (c) 400 °C, (d) 500 °C and (e) 700 °C, respectively.

## Raman spectra of annealed xFTO-(1-x)FO (x=0.60)

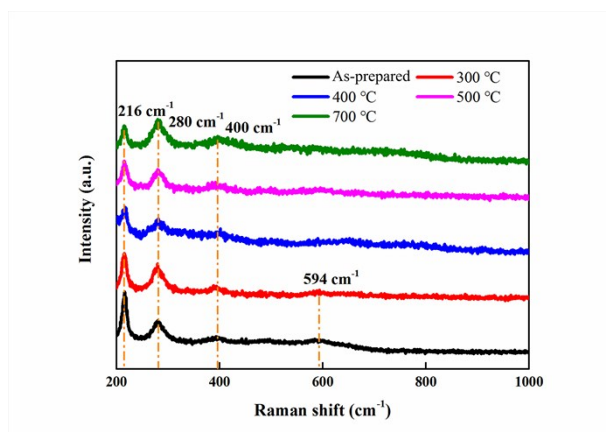

Figure S5. Raman spectra of xFTO-(1-x)FO (x=0.60) annealed at different temperatures.

## XPS of annealed xFTO-(1-x)FO (x=0.60)

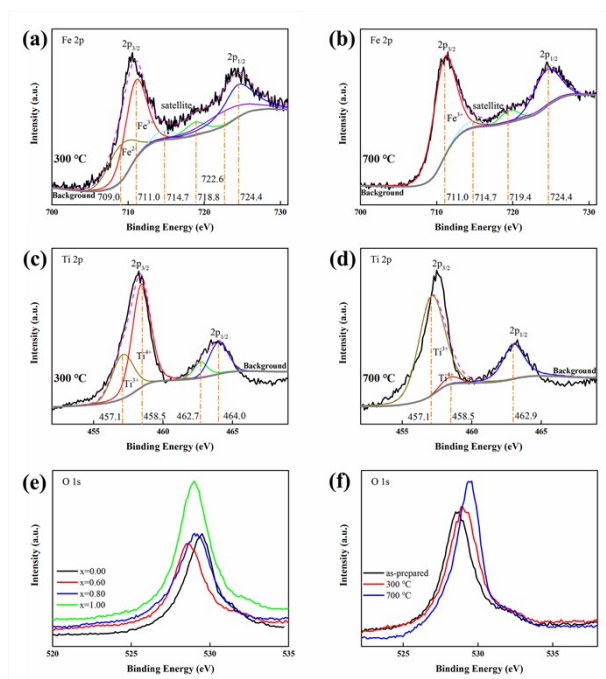

Figure S6. The XPS of annealed xFTO-(1-x)FO (x=0.60) at 300 °C and 700 °C.

### Photocatalysis of annealed xFTO-(1-x)FO (x=0.60)

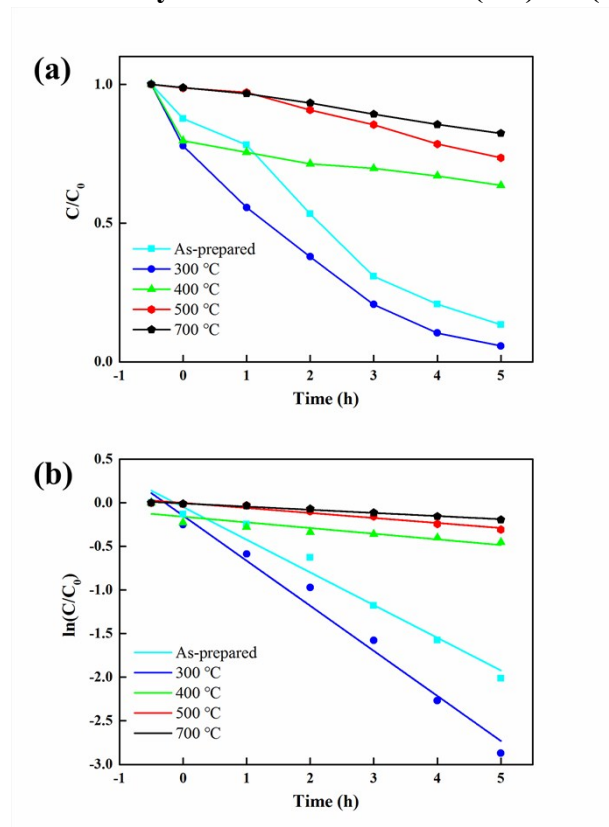

Figure S7. (a) Photo-decolorization ratios of RhB under visible light irradiation, using annealed xFTO-(1-x)FO (x=0.60). (b) Fitting using Pseudo-first-order model.

### Magnetic hysteresis loops of annealed xFTO-(1-x)FO (x=0.60)

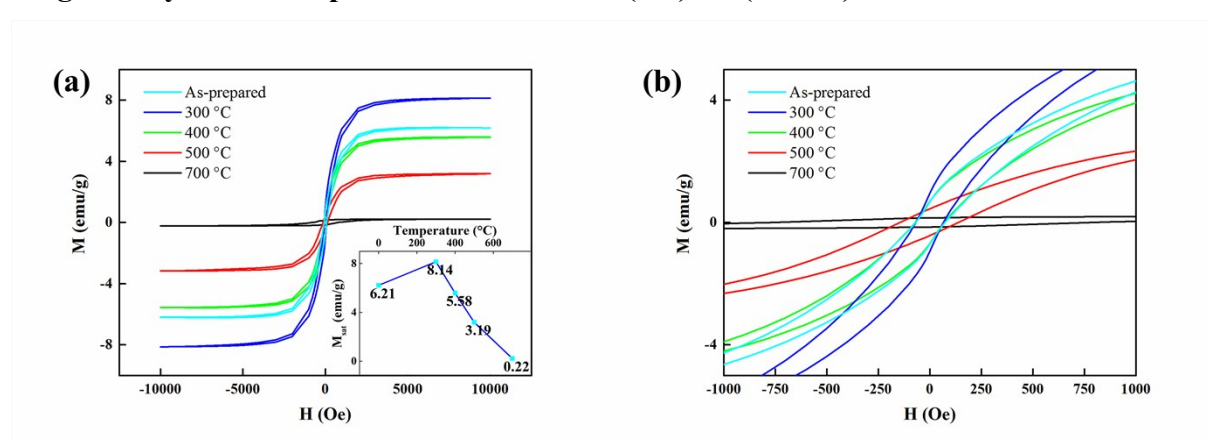

Figure S8. (a) Magnetic hysteresis loops of annealed xFTO-(1-x)FO (x=0.60), inset shows the dependence of  $M_{sat}$  on annealed temperatures. (b) Magnified view of M-H curves at low field region.
